# Supplementary material
Source: Springer Nature journal article supplement (https://www.springermedizin.de/resource/supplementary/12885_2012_3911_MOESM4_ESM.pdf/9464730)

**A****Sk-Hep1**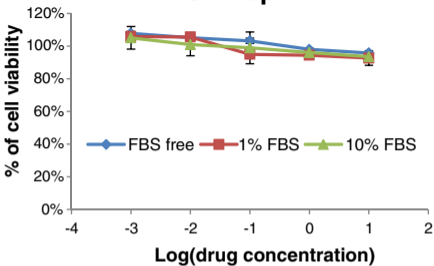**B****Huh-7**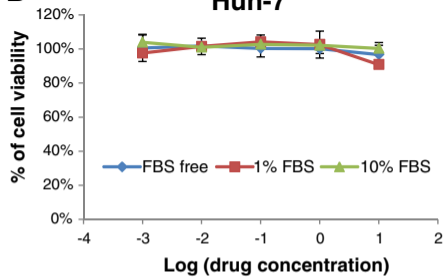**C****sk-Hep1**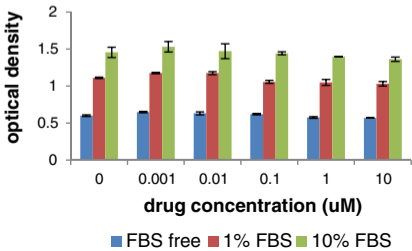**D****Huh-7**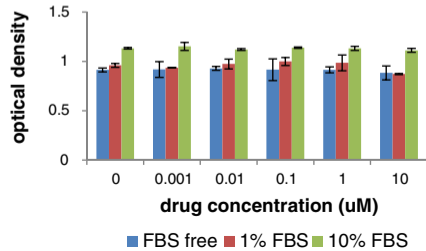

Supplement: MOESM4 [file 9464730]
